# Supplementary material
Source: publisher figshare collection journal article supplement (https://acs.figshare.com/ndownloader/files/5179447)
Supplement: Supplementary file 1 [file 5179447]

data for [(h5:h1-2-Me-4-PhC5H2CO2CH2CH2PPh2)Ru{h4-CH2=CHC(Me)=CH2}][PF6] �1.5Me2CO
#------------------------------------------------------------------------------
_audit_creation_date                  'Thu Jan  8 06:57:32 2004'
_audit_creation_method                'from TEXRAY.INF file'
_audit_update_record                   ?
#------------------------------------------------------------------------------
_computing_data_collection            'Rigaku/AFC Diffractometer Control'
_computing_cell_refinement            'Rigaku/AFC Diffractometer Control'
_computing_data_reduction             'teXsan'
_computing_structure_solution          'DIRDIF92 (PATTY)'
_computing_structure_refinement       'teXsan'
_computing_publication_material       'teXsan'
_computing_molecular_graphics          ?
#------------------------------------------------------------------------------
_chemical_compound_source              ?
_chemical_name_common                  ?
_chemical_formula_weight               812.73
_chemical_formula_analytical           ?
_chemical_formula_sum                  'C36.50 H41 F6 O3.50 P2 Ru '
_chemical_formula_moiety               '?'
_chemical_formula_structural           ?
_chemical_melting_point                ?
#------------------------------------------------------------------------------
_cell_length_a                         12.548(3)
_cell_length_b                         14.590(3)
_cell_length_c                         11.140(2)
_cell_angle_alpha                      107.23(1)
_cell_angle_beta                       111.85(1)
_cell_angle_gamma                      70.55(2)
_cell_volume                           1750.1(7)
_cell_formula_units_Z                  2
_cell_measurement_temperature          223.2
_cell_measurement_reflns_used          25
_cell_measurement_theta_min            17.4
_cell_measurement_theta_max            17.5
#------------------------------------------------------------------------------
_symmetry_cell_setting                 triclinic
_symmetry_space_group_name_H-M        'P -1         '
_symmetry_Int_Tables_number            2
_symmetry_space_group_name_Hall        ?
loop_
_symmetry_equiv_pos_as_xyz
x,y,z
-x,-y,-z
#------------------------------------------------------------------------------
_exptl_crystal_description            'prismatic'
_exptl_crystal_colour                 'yellow'
_exptl_crystal_size_max                0.400
_exptl_crystal_size_mid                0.300
_exptl_crystal_size_min                0.200
_exptl_crystal_density_diffrn          1.542
_exptl_crystal_density_method         'not measured'
_exptl_crystal_F_000                   832.00
_exptl_absorpt_coefficient_mu          0.609
_exptl_absorpt_correction_type         psi-scan
_exptl_absorpt_process_details        '(North, Phillips & Mathews, 1968)'
_exptl_absorpt_correction_T_min        0.883
_exptl_absorpt_correction_T_max        0.999
_exptl_special_details
;
 ?
;
#------------------------------------------------------------------------------
_diffrn_special_details
;
 ?
;
_diffrn_ambient_temperature            223.2
_diffrn_radiation_wavelength           0.7107
_diffrn_radiation_type                'Mo K\a'
_diffrn_radiation_source              'Rigaku rotating anode'
_diffrn_radiation_monochromator        graphite
_diffrn_radiation_detector            'scintillation counter'
_diffrn_measurement_device_type       'Rigaku AFC7R'
_diffrn_measurement_method             \w-2\q

_diffrn_standards_number              3
_diffrn_standards_interval_count      150
_diffrn_standards_decay_%             0.85
loop_
_diffrn_standard_refln_index_h
_diffrn_standard_refln_index_k
_diffrn_standard_refln_index_l
     -2       1     -1
     -1       2     -1
      2       1      1
_diffrn_reflns_number                  8423
_reflns_number_total                   8055
_reflns_number_gt                      7370
_reflns_observed_expression             >3.0sigma(I)
_diffrn_reflns_av_R_equivalents        0.105
_diffrn_reflns_av_sigmaI/netI          0.022
_diffrn_reflns_limit_h_min             0
_diffrn_reflns_limit_h_max             16
_diffrn_reflns_limit_k_min             -17
_diffrn_reflns_limit_k_max             18
_diffrn_reflns_limit_l_min             -14
_diffrn_reflns_limit_l_max             13
_diffrn_reflns_theta_min               2.63
_diffrn_reflns_theta_max               27.50
_diffrn_reflns_reduction_process      'Lp corrections applied'
_diffrn_orient_matrix_UB_11           -0.06344
_diffrn_orient_matrix_UB_12            0.06246
_diffrn_orient_matrix_UB_13            0.01020
_diffrn_orient_matrix_UB_21           -0.05285
_diffrn_orient_matrix_UB_22           -0.03928
_diffrn_orient_matrix_UB_23           -0.00237
_diffrn_orient_matrix_UB_31            0.03242
_diffrn_orient_matrix_UB_32            0.00723
_diffrn_orient_matrix_UB_33            0.09808
#------------------------------------------------------------------------------
loop_
_atom_type_symbol
_atom_type_description
_atom_type_scat_dispersion_real
_atom_type_scat_imag
_atom_type_scat_source
  'C'  'C'   0.003 0.002 
;International Tables for Crystallography
(1992, Vol. C, Tables 4.2.6.8 and 6.1.1.1)
;
  'H'  'H'   0.000 0.000 
;International Tables for Crystallography
(1992, Vol. C, Table 6.1.1.2)
;
  'F'  'F'   0.017 0.010 
;International Tables for Crystallography
(1992, Vol. C, Tables 4.2.6.8 and 6.1.1.1)
;
  'O'  'O'   0.011 0.006 
;International Tables for Crystallography
(1992, Vol. C, Tables 4.2.6.8 and 6.1.1.1)
;
  'P'  'P'   0.102 0.094 
;International Tables for Crystallography
(1992, Vol. C, Tables 4.2.6.8 and 6.1.1.1)
;
  'RuRu'   -1.259 0.836 
;International Tables for Crystallography
(1992, Vol. C, Tables 4.2.6.8 and 6.1.1.1)
;
#------------------------------------------------------------------------------
loop_
_atom_site_label
_atom_site_type_symbol
_atom_site_fract_x
_atom_site_fract_y
_atom_site_fract_z
_atom_site_U_iso_or_equiv
_atom_site_adp_type
_atom_site_occupancy
_atom_site_calc_flags
_atom_site_refinement_flags
_atom_site_disorder_assembly
_atom_site_disorder_group
 Ru(1)  Ru -0.18249(2) -0.15999(1) -0.02704(2) 0.01948(5)  Uani 1.00 d ...
 P(1)   P  -0.30544(6) -0.12660(5) -0.24198(7) 0.0229(1)   Uani 1.00 d ...
 P(2)   P  -0.09936(9) 0.27245(7)  0.48196(9)  0.0406(2)   Uani 1.00 d ...
 F(1)   F  -0.0482(4)  0.1686(3)   0.5270(4)   0.097(1)    Uani 1.00 d ...
 F(2)   F  -0.1502(5)  0.3738(3)   0.4350(4)   0.129(2)    Uani 1.00 d ...
 F(3)   F  -0.1409(4)  0.3124(4)   0.6095(3)   0.106(1)    Uani 1.00 d ...
 F(4)   F  -0.0529(3)  0.2252(3)   0.3565(3)   0.0708(8)   Uani 1.00 d ...
 F(5)   F  -0.2180(3)  0.2408(4)   0.3994(3)   0.103(1)    Uani 1.00 d ...
 F(6)   F  0.0245(4)   0.2959(4)   0.5666(4)   0.127(1)    Uani 1.00 d ...
 O(1)   O  -0.4939(2)  -0.1362(2)  -0.0205(3)  0.0523(7)   Uani 1.00 d ...
 O(2)   O  -0.4570(2)  -0.2376(2)  -0.2053(3)  0.0398(6)   Uani 1.00 d ...
 O(3)   O  -0.5247(4)  -0.3353(4)  -0.9373(4)  0.088(1)    Uani 1.00 d ...
 O(4)   O  -0.5749(7)  -0.3739(6)  -0.604(1)   0.104(3)    Uani 0.50 d P..
 C(1)   C  -0.3004(3)  -0.2367(2)  -0.0146(3)  0.0278(6)   Uani 1.00 d ...
 C(2)   C  -0.2317(3)  -0.2079(2)  0.1188(3)   0.0295(6)   Uani 1.00 d ...
 C(3)   C  -0.1106(3)  -0.2551(2)  0.1257(3)   0.0276(6)   Uani 1.00 d ...
 C(4)   C  -0.1028(3)  -0.3179(2)  0.0027(3)   0.0255(6)   Uani 1.00 d ...
 C(5)   C  -0.2192(3)  -0.3066(2)  -0.0854(3)  0.0265(6)   Uani 1.00 d ...
 C(6)   C  -0.2784(3)  -0.1471(3)  0.2312(3)   0.0440(8)   Uani 1.00 d ...
 C(7)   C  0.0082(3)   -0.3851(2)  -0.0240(3)  0.0271(6)   Uani 1.00 d ...
 C(8)   C  0.1193(3)   -0.3801(3)  0.0686(3)   0.0369(7)   Uani 1.00 d ...
 C(9)   C  0.2224(3)   -0.4444(3)  0.0458(4)   0.0446(9)   Uani 1.00 d ...
 C(10)  C  0.2182(3)   -0.5158(3)  -0.0702(4)  0.0461(9)   Uani 1.00 d ...
 C(11)  C  0.1080(3)   -0.5215(2)  -0.1629(3)  0.0402(8)   Uani 1.00 d ...
 C(12)  C  0.0045(3)   -0.4576(2)  -0.1391(3)  0.0332(7)   Uani 1.00 d ...
 C(13)  C  -0.4274(3)  -0.1977(2)  -0.0743(3)  0.0336(7)   Uani 1.00 d ...
 C(14)  C  -0.5309(3)  -0.1682(3)  -0.2896(4)  0.0422(8)   Uani 1.00 d ...
 C(15)  C  -0.4692(3)  -0.0870(3)  -0.2671(3)  0.0330(7)   Uani 1.00 d ...
 C(16)  C  -0.2930(3)  -0.0240(2)  -0.2971(3)  0.0277(6)   Uani 1.00 d ...
 C(17)  C  -0.2227(3)  -0.0459(3)  -0.3798(3)  0.0336(7)   Uani 1.00 d ...
 C(18)  C  -0.2122(3)  0.0327(3)   -0.4202(3)  0.0410(8)   Uani 1.00 d ...
 C(19)  C  -0.2687(4)  0.1285(3)   -0.3801(4)  0.0436(8)   Uani 1.00 d ...
 C(20)  C  -0.3367(3)  0.1496(3)   -0.2971(4)  0.0395(8)   Uani 1.00 d ...
 C(21)  C  -0.3512(3)  0.0741(3)   -0.2578(3)  0.0356(7)   Uani 1.00 d ...
 C(22)  C  -0.2841(3)  -0.2311(2)  -0.3777(3)  0.0287(6)   Uani 1.00 d ...
 C(23)  C  -0.1793(3)  -0.3052(2)  -0.3599(3)  0.0299(6)   Uani 1.00 d ...
 C(24)  C  -0.1625(3)  -0.3858(3)  -0.4624(3)  0.0378(7)   Uani 1.00 d ...
 C(25)  C  -0.2501(4)  -0.3909(3)  -0.5822(3)  0.0449(9)   Uani 1.00 d ...
 C(26)  C  -0.3526(4)  -0.3148(3)  -0.6038(3)  0.0481(9)   Uani 1.00 d ...
 C(27)  C  -0.3702(3)  -0.2335(3)  -0.5010(3)  0.0399(8)   Uani 1.00 d ...
 C(28)  C  -0.2213(3)  0.0048(2)   0.0265(3)   0.0325(7)   Uani 1.00 d ...
 C(29)  C  -0.1123(3)  -0.0353(2)  0.1124(3)   0.0310(7)   Uani 1.00 d ...
 C(30)  C  -0.0238(3)  -0.1049(2)  0.0563(3)   0.0302(6)   Uani 1.00 d ...
 C(31)  C  -0.0450(2)  -0.1292(2)  -0.0813(3)  0.0302(6)   Uani 1.00 d ...
 C(32)  C  -0.0901(4)  -0.0132(3)  0.2592(4)   0.0457(9)   Uani 1.00 d ...
 C(33)  C  -0.5946(4)  -0.3428(3)  -1.0481(4)  0.0472(9)   Uani 1.00 d ...
 C(34)  C  -0.7166(4)  -0.2738(3)  -1.0760(4)  0.053(1)    Uani 1.00 d ...
 C(35)  C  -0.5629(5)  -0.4194(4)  -1.1600(5)  0.064(1)    Uani 1.00 d ...
 C(36)  C  -0.5516(8)  -0.4411(7)  -0.5593(9)  0.054(2)    Uani 0.50 d P..
 C(37)  C  -0.4098(9)  -0.4727(7)  -0.430(1)   0.163(3)    Uani 1.00 d ...
 H(1)   H  -0.0447     -0.2459     0.2015      0.0331      Uiso 1.00 calc ...
 H(2)   H  -0.2409     -0.3390     -0.1753     0.0318      Uiso 1.00 calc ...
 H(3)   H  -0.2456     -0.0914     0.2702      0.0528      Uiso 1.00 calc ...
 H(4)   H  -0.3624     -0.1252     0.1995      0.0528      Uiso 1.00 calc ...
 H(5)   H  -0.2570     -0.1863     0.2952      0.0528      Uiso 1.00 calc ...
 H(6)   H  0.1238      -0.3320     0.1482      0.0442      Uiso 1.00 calc ...
 H(7)   H  0.2968      -0.4399     0.1098      0.0536      Uiso 1.00 calc ...
 H(8)   H  0.2892      -0.5597     -0.0858     0.0553      Uiso 1.00 calc ...
 H(9)   H  0.1037      -0.5694     -0.2427     0.0482      Uiso 1.00 calc ...
 H(10)  H  -0.0700     -0.4634     -0.2022     0.0398      Uiso 1.00 calc ...
 H(11)  H  -0.5454     -0.2019     -0.3790     0.0507      Uiso 1.00 calc ...
 H(12)  H  -0.6041     -0.1388     -0.2704     0.0507      Uiso 1.00 calc ...
 H(13)  H  -0.4822     -0.0397     -0.1910     0.0397      Uiso 1.00 calc ...
 H(14)  H  -0.5059     -0.0564     -0.3419     0.0397      Uiso 1.00 calc ...
 H(15)  H  -0.1829     -0.1124     -0.4079     0.0404      Uiso 1.00 calc ...
 H(16)  H  -0.1651     0.0187      -0.4764     0.0491      Uiso 1.00 calc ...
 H(17)  H  -0.2614     0.1806      -0.4089     0.0523      Uiso 1.00 calc ...
 H(18)  H  -0.3738     0.2165      -0.2669     0.0474      Uiso 1.00 calc ...
 H(19)  H  -0.4008     0.0891      -0.2041     0.0427      Uiso 1.00 calc ...
 H(20)  H  -0.1187     -0.3011     -0.2775     0.0358      Uiso 1.00 calc ...
 H(21)  H  -0.0910     -0.4368     -0.4496     0.0454      Uiso 1.00 calc ...
 H(22)  H  -0.2402     -0.4472     -0.6507     0.0539      Uiso 1.00 calc ...
 H(23)  H  -0.4108     -0.3176     -0.6879     0.0577      Uiso 1.00 calc ...
 H(24)  H  -0.4399     -0.1808     -0.5153     0.0479      Uiso 1.00 calc ...
 H(25)  H  -0.2819     0.0513      0.0607      0.0390      Uiso 1.00 calc ...
 H(26)  H  -0.2349     -0.0143     -0.0662     0.0390      Uiso 1.00 calc ...
 H(27)  H  0.0499      -0.1352     0.1124      0.0362      Uiso 1.00 calc ...
 H(28)  H  -0.1186     -0.0991     -0.1379     0.0362      Uiso 1.00 calc ...
 H(29)  H  0.0144      -0.1755     -0.1176     0.0362      Uiso 1.00 calc ...
 H(30)  H  -0.0768     -0.0726     0.2875      0.0549      Uiso 1.00 calc ...
 H(31)  H  -0.0224     0.0129      0.3025      0.0549      Uiso 1.00 calc ...
 H(32)  H  -0.1572     0.0339      0.2802      0.0549      Uiso 1.00 calc ...
 H(33)  H  -0.7102     -0.2073     -1.0539     0.0631      Uiso 1.00 calc ...
 H(34)  H  -0.7585     -0.2893     -1.1670     0.0631      Uiso 1.00 calc ...
 H(35)  H  -0.7580     -0.2811     -1.0248     0.0631      Uiso 1.00 calc ...
 H(36)  H  -0.5445     -0.4834     -1.1416     0.0764      Uiso 1.00 calc ...
 H(37)  H  -0.6280     -0.4132     -1.2382     0.0764      Uiso 1.00 calc ...
 H(38)  H  -0.4960     -0.4107     -1.1717     0.0764      Uiso 1.00 calc ...
 H(39)  H  -0.4247     -0.4761     -0.3540     0.1956      Uiso 0.50 calc P..
 H(40)  H  -0.3632     -0.5350     -0.4616     0.1956      Uiso 0.50 calc P..
 H(41)  H  -0.3682     -0.4232     -0.4077     0.1956      Uiso 0.50 calc P..
 H(42)  H  -0.3368     -0.4935     -0.4496     0.1956      Uiso 0.50 calc P..
 H(43)  H  -0.4680     -0.4333     -0.4905     0.1956      Uiso 0.50 calc P..
 H(44)  H  -0.3992     -0.4347     -0.3428     0.1956      Uiso 0.50 calc P..

loop_
_atom_site_aniso_label
_atom_site_aniso_U_11
_atom_site_aniso_U_22
_atom_site_aniso_U_33
_atom_site_aniso_U_12
_atom_site_aniso_U_13
_atom_site_aniso_U_23
 Ru(1)  0.01897(10) 0.0211(1)   0.0188(1)   -0.00535(8) 0.00602(8)  0.00318(8) 
 P(1)   0.0203(3)   0.0258(3)   0.0214(3)   -0.0052(2)  0.0052(2)   0.0044(2)  
 P(2)   0.0507(5)   0.0455(4)   0.0271(3)   -0.0198(3)  0.0067(3)   0.0065(3)  
 F(1)   0.127(3)    0.083(2)    0.081(2)    -0.028(2)   0.006(2)    0.047(1)   
 F(2)   0.226(5)    0.055(2)    0.105(3)    -0.002(3)   0.063(3)    0.032(2)   
 F(3)   0.116(3)    0.143(3)    0.051(1)    -0.016(2)   0.044(1)    0.001(2)   
 F(4)   0.074(2)    0.090(2)    0.051(1)    -0.018(1)   0.030(1)    0.006(1)   
 F(5)   0.069(2)    0.202(3)    0.061(2)    -0.075(2)   -0.002(1)   0.036(2)   
 F(6)   0.133(2)    0.226(3)    0.062(2)    -0.140(2)   -0.018(2)   0.034(2)   
 O(1)   0.030(1)    0.074(2)    0.059(1)    -0.008(1)   0.0241(9)   0.012(1)   
 O(2)   0.0290(10)  0.043(1)    0.048(1)    -0.0168(8)  0.0046(9)   0.0090(10) 
 O(3)   0.065(2)    0.112(3)    0.042(2)    0.000(2)    -0.011(2)   0.012(2)   
 O(4)   0.073(4)    0.061(4)    0.205(9)    -0.017(3)   0.055(5)    0.040(5)   
 C(1)   0.029(1)    0.028(1)    0.035(1)    -0.0084(9)  0.0141(9)   0.0097(10) 
 C(2)   0.035(1)    0.032(1)    0.030(1)    -0.006(1)   0.0177(9)   0.0096(10) 
 C(3)   0.033(1)    0.028(1)    0.024(1)    -0.004(1)   0.0095(9)   0.0094(9)  
 C(4)   0.031(1)    0.025(1)    0.024(1)    -0.0079(9)  0.0100(9)   0.0060(9)  
 C(5)   0.029(1)    0.024(1)    0.031(1)    -0.0097(9)  0.0120(9)   0.0035(9)  
 C(6)   0.048(2)    0.053(2)    0.035(1)    -0.006(1)   0.024(1)    0.006(1)   
 C(7)   0.033(1)    0.022(1)    0.031(1)    -0.0036(9)  0.0148(9)   0.0092(9)  
 C(8)   0.035(1)    0.038(2)    0.034(1)    -0.004(1)   0.012(1)    0.006(1)   
 C(9)   0.032(1)    0.051(2)    0.051(2)    0.000(1)    0.013(1)    0.020(1)   
 C(10)  0.041(2)    0.041(2)    0.066(2)    0.009(1)    0.033(1)    0.023(1)   
 C(11)  0.055(2)    0.026(1)    0.048(2)    0.001(1)    0.032(1)    0.008(1)   
 C(12)  0.045(1)    0.025(1)    0.035(1)    -0.005(1)   0.019(1)    0.007(1)   
 C(13)  0.029(1)    0.040(1)    0.042(1)    -0.0167(10) 0.0146(10)  0.008(1)   
 C(14)  0.023(1)    0.057(2)    0.048(2)    -0.016(1)   0.004(1)    0.013(1)   
 C(15)  0.021(1)    0.040(2)    0.034(1)    -0.006(1)   0.004(1)    0.010(1)   
 C(16)  0.027(1)    0.036(1)    0.020(1)    -0.009(1)   0.0016(9)   0.0112(9)  
 C(17)  0.036(1)    0.040(2)    0.027(1)    -0.011(1)   0.008(1)    0.010(1)   
 C(18)  0.051(2)    0.053(2)    0.031(1)    -0.023(1)   0.011(1)    0.014(1)   
 C(19)  0.048(2)    0.046(2)    0.042(2)    -0.018(1)   0.001(1)    0.023(1)   
 C(20)  0.041(2)    0.035(1)    0.038(2)    -0.008(1)   -0.001(1)   0.017(1)   
 C(21)  0.034(1)    0.040(2)    0.032(1)    -0.007(1)   0.006(1)    0.014(1)   
 C(22)  0.031(1)    0.033(1)    0.021(1)    -0.012(1)   0.0074(9)   0.0008(10) 
 C(23)  0.034(1)    0.031(1)    0.028(1)    -0.009(1)   0.0136(10)  0.0044(10) 
 C(24)  0.047(2)    0.031(1)    0.038(1)    -0.006(1)   0.024(1)    0.001(1)   
 C(25)  0.058(2)    0.050(2)    0.033(1)    -0.026(1)   0.022(1)    -0.010(1)  
 C(26)  0.054(2)    0.061(2)    0.024(1)    -0.026(2)   0.006(1)    -0.005(1)  
 C(27)  0.041(2)    0.048(2)    0.023(1)    -0.012(1)   0.002(1)    0.004(1)   
 C(28)  0.033(1)    0.030(1)    0.029(1)    -0.008(1)   0.007(1)    -0.001(1)  
 C(29)  0.033(1)    0.025(1)    0.030(1)    -0.013(1)   0.004(1)    0.000(1)   
 C(30)  0.025(1)    0.031(1)    0.035(1)    -0.0144(10) 0.003(1)    0.005(1)   
 C(31)  0.021(1)    0.038(1)    0.040(1)    -0.0124(9)  0.0110(9)   0.010(1)   
 C(32)  0.057(2)    0.039(2)    0.029(2)    -0.015(2)   0.003(1)    -0.001(1)  
 C(33)  0.044(2)    0.058(2)    0.040(2)    -0.020(2)   0.003(1)    0.014(2)   
 C(34)  0.055(2)    0.048(2)    0.049(2)    -0.003(2)   0.012(2)    0.015(2)   
 C(35)  0.055(2)    0.074(3)    0.057(2)    -0.005(2)   0.023(2)    0.009(2)   
 C(36)  0.060(4)    0.056(4)    0.056(4)    -0.012(3)   0.027(3)    0.015(3)   
 C(37)  0.235(5)    0.145(6)    0.198(5)    -0.115(4)   0.171(3)    -0.058(4)  
#------------------------------------------------------------------------------
_refine_special_details
;
Refinement based on F against all reflections. The weighted R-factor (wR) and
goodness of fit (S) are based on F, conventional R-factors (R) are calculated
on F, with F set to zero for negative F. The threshold expression of
F^2^ > 3sigma(F^2^) is used only for calculating R-factors(gt) etc. thus the
refinement was done using all reflections.  
;

_refine_ls_structure_factor_coef       F
_refine_ls_matrix_type                 full
_refine_ls_weighting_scheme            calc
_refine_ls_weighting_details
   'w = 1/[\s^2^(Fo) + 0.00783|Fo|^2^]'
_refine_ls_hydrogen_treatment          noref
_refine_ls_extinction_method           none
_refine_ls_extinction_coef             ?
_refine_ls_abs_structure_details       ?
_refine_ls_abs_structure_Flack         ?
_refine_ls_number_reflns               7370
_refine_ls_number_parameters           451
_refine_ls_number_restraints           0
_refine_ls_number_constraints          0
_refine_ls_R_factor_all                ?
_refine_ls_R_factor_gt                 0.0640
_refine_ls_wR_factor_all               ?
_refine_ls_wR_factor_ref               0.1055
_refine_ls_wR_factor_gt                0.1055
_refine_ls_goodness_of_fit_all         ?
_refine_ls_goodness_of_fit_ref         1.155
_refine_ls_shift/su_max                0.0993
_refine_ls_shift/su_mean               0.0027
_refine_diff_density_min               -2.96
_refine_diff_density_max               2.10
#------------------------------------------------------------------------------
_geom_special_details
;
 ?
;
loop_
_geom_bond_atom_site_label_1
_geom_bond_atom_site_label_2
_geom_bond_distance
_geom_bond_site_symmetry_1
_geom_bond_site_symmetry_2
_geom_bond_publ_flag
 Ru(1)     P(1)      2.4066(7)  1_555 1_555 yes
 Ru(1)     C(1)      2.192(3)   1_555 1_555 yes
 Ru(1)     C(2)      2.285(3)   1_555 1_555 yes
 Ru(1)     C(3)      2.249(3)   1_555 1_555 yes
 Ru(1)     C(4)      2.257(3)   1_555 1_555 yes
 Ru(1)     C(5)      2.196(3)   1_555 1_555 yes
 Ru(1)     C(28)     2.228(3)   1_555 1_555 yes
 Ru(1)     C(29)     2.207(3)   1_555 1_555 yes
 Ru(1)     C(30)     2.172(3)   1_555 1_555 yes
 Ru(1)     C(31)     2.237(3)   1_555 1_555 yes
 P(1)      C(15)     1.875(3)   1_555 1_555 yes
 P(1)      C(16)     1.848(3)   1_555 1_555 yes
 P(1)      C(22)     1.829(3)   1_555 1_555 yes
 P(2)      F(1)      1.589(4)   1_555 1_555 yes
 P(2)      F(2)      1.564(4)   1_555 1_555 yes
 P(2)      F(3)      1.578(4)   1_555 1_555 yes
 P(2)      F(4)      1.593(3)   1_555 1_555 yes
 P(2)      F(5)      1.569(3)   1_555 1_555 yes
 P(2)      F(6)      1.579(4)   1_555 1_555 yes
 O(1)      C(13)     1.190(4)   1_555 1_555 yes
 O(2)      C(13)     1.358(4)   1_555 1_555 yes
 O(2)      C(14)     1.434(5)   1_555 1_555 yes
 O(3)      C(33)     1.217(5)   1_555 1_555 yes
 O(4)      C(36)     1.13(1)    1_555 1_555 yes
 C(1)      C(2)      1.430(4)   1_555 1_555 yes
 C(1)      C(5)      1.460(4)   1_555 1_555 yes
 C(1)      C(13)     1.462(4)   1_555 1_555 yes
 C(2)      C(3)      1.427(4)   1_555 1_555 yes
 C(2)      C(6)      1.496(4)   1_555 1_555 yes
 C(3)      C(4)      1.423(4)   1_555 1_555 yes
 C(3)      H(1)      0.950      1_555 1_555 no
 C(4)      C(5)      1.411(4)   1_555 1_555 yes
 C(4)      C(7)      1.489(4)   1_555 1_555 yes
 C(5)      H(2)      0.950      1_555 1_555 no
 C(6)      H(3)      0.950      1_555 1_555 no
 C(6)      H(4)      0.950      1_555 1_555 no
 C(6)      H(5)      0.950      1_555 1_555 no
 C(7)      C(8)      1.402(4)   1_555 1_555 yes
 C(7)      C(12)     1.397(4)   1_555 1_555 yes
 C(8)      C(9)      1.383(5)   1_555 1_555 yes
 C(8)      H(6)      0.950      1_555 1_555 no
 C(9)      C(10)     1.394(6)   1_555 1_555 yes
 C(9)      H(7)      0.950      1_555 1_555 no
 C(10)     C(11)     1.397(6)   1_555 1_555 yes
 C(10)     H(8)      0.950      1_555 1_555 no
 C(11)     C(12)     1.388(5)   1_555 1_555 yes
 C(11)     H(9)      0.950      1_555 1_555 no
 C(12)     H(10)     0.950      1_555 1_555 no
 C(14)     C(15)     1.534(5)   1_555 1_555 yes
 C(14)     H(11)     0.950      1_555 1_555 no
 C(14)     H(12)     0.950      1_555 1_555 no
 C(15)     H(13)     0.950      1_555 1_555 no
 C(15)     H(14)     0.950      1_555 1_555 no
 C(16)     C(17)     1.404(5)   1_555 1_555 yes
 C(16)     C(21)     1.394(4)   1_555 1_555 yes
 C(17)     C(18)     1.408(5)   1_555 1_555 yes
 C(17)     H(15)     0.950      1_555 1_555 no
 C(18)     C(19)     1.365(5)   1_555 1_555 yes
 C(18)     H(16)     0.950      1_555 1_555 no
 C(19)     C(20)     1.386(6)   1_555 1_555 yes
 C(19)     H(17)     0.950      1_555 1_555 no
 C(20)     C(21)     1.384(5)   1_555 1_555 yes
 C(20)     H(18)     0.950      1_555 1_555 no
 C(21)     H(19)     0.950      1_555 1_555 no
 C(22)     C(23)     1.386(4)   1_555 1_555 yes
 C(22)     C(27)     1.395(4)   1_555 1_555 yes
 C(23)     C(24)     1.396(4)   1_555 1_555 yes
 C(23)     H(20)     0.950      1_555 1_555 no
 C(24)     C(25)     1.378(5)   1_555 1_555 yes
 C(24)     H(21)     0.950      1_555 1_555 no
 C(25)     C(26)     1.386(6)   1_555 1_555 yes
 C(25)     H(22)     0.950      1_555 1_555 no
 C(26)     C(27)     1.406(5)   1_555 1_555 yes
 C(26)     H(23)     0.950      1_555 1_555 no
 C(27)     H(24)     0.950      1_555 1_555 no
 C(28)     C(29)     1.398(4)   1_555 1_555 yes
 C(28)     H(25)     0.950      1_555 1_555 no
 C(28)     H(26)     0.950      1_555 1_555 no
 C(29)     C(30)     1.430(4)   1_555 1_555 yes
 C(29)     C(32)     1.505(5)   1_555 1_555 yes
 C(30)     C(31)     1.409(4)   1_555 1_555 yes
 C(30)     H(27)     0.950      1_555 1_555 no
 C(31)     H(28)     0.950      1_555 1_555 no
 C(31)     H(29)     0.950      1_555 1_555 no
 C(32)     H(30)     0.950      1_555 1_555 no
 C(32)     H(31)     0.950      1_555 1_555 no
 C(32)     H(32)     0.950      1_555 1_555 no
 C(33)     C(34)     1.503(6)   1_555 1_555 yes
 C(33)     C(35)     1.487(7)   1_555 1_555 yes
 C(34)     H(33)     0.950      1_555 1_555 no
 C(34)     H(34)     0.950      1_555 1_555 no
 C(34)     H(35)     0.950      1_555 1_555 no
 C(35)     H(36)     0.950      1_555 1_555 no
 C(35)     H(37)     0.950      1_555 1_555 no
 C(35)     H(38)     0.950      1_555 1_555 no
 C(36)     C(37)     1.84(1)    1_555 1_555 yes
 C(36)     C(37)     1.45(1)    1_555 2_444 yes
 C(37)     H(39)     0.950      1_555 1_555 no
 C(37)     H(40)     0.950      1_555 1_555 no
 C(37)     H(41)     0.950      1_555 1_555 no
 C(37)     H(42)     0.950      1_555 1_555 no
 C(37)     H(43)     0.950      1_555 1_555 no
 C(37)     H(44)     0.950      1_555 1_555 no
#------------------------------------------------------------------------------
loop_
_geom_angle_atom_site_label_1
_geom_angle_atom_site_label_2
_geom_angle_atom_site_label_3
_geom_angle
_geom_angle_site_symmetry_1
_geom_angle_site_symmetry_2
_geom_angle_site_symmetry_3
_geom_angle_publ_flag
   P(1)      Ru(1)     C(1)      93.40(8)   1_555 1_555 1_555 yes
   P(1)      Ru(1)     C(2)      127.77(8)  1_555 1_555 1_555 yes
   P(1)      Ru(1)     C(3)      150.95(8)  1_555 1_555 1_555 yes
   P(1)      Ru(1)     C(4)      119.98(7)  1_555 1_555 1_555 yes
   P(1)      Ru(1)     C(5)      89.55(8)   1_555 1_555 1_555 yes
   P(1)      Ru(1)     C(28)     82.40(8)   1_555 1_555 1_555 yes
   P(1)      Ru(1)     C(29)     114.95(9)  1_555 1_555 1_555 yes
   P(1)      Ru(1)     C(30)     115.49(9)  1_555 1_555 1_555 yes
   P(1)      Ru(1)     C(31)     83.06(8)   1_555 1_555 1_555 yes
   C(1)      Ru(1)     C(2)      37.2(1)    1_555 1_555 1_555 yes
   C(1)      Ru(1)     C(3)      62.0(1)    1_555 1_555 1_555 yes
   C(1)      Ru(1)     C(4)      63.0(1)    1_555 1_555 1_555 yes
   C(1)      Ru(1)     C(5)      38.9(1)    1_555 1_555 1_555 yes
   C(1)      Ru(1)     C(28)     119.9(1)   1_555 1_555 1_555 yes
   C(1)      Ru(1)     C(29)     129.8(1)   1_555 1_555 1_555 yes
   C(1)      Ru(1)     C(30)     151.1(1)   1_555 1_555 1_555 yes
   C(1)      Ru(1)     C(31)     161.4(1)   1_555 1_555 1_555 yes
   C(2)      Ru(1)     C(3)      36.7(1)    1_555 1_555 1_555 yes
   C(2)      Ru(1)     C(4)      62.0(1)    1_555 1_555 1_555 yes
   C(2)      Ru(1)     C(5)      62.8(1)    1_555 1_555 1_555 yes
   C(2)      Ru(1)     C(28)     105.9(1)   1_555 1_555 1_555 yes
   C(2)      Ru(1)     C(29)     96.8(1)    1_555 1_555 1_555 yes
   C(2)      Ru(1)     C(30)     115.0(1)   1_555 1_555 1_555 yes
   C(2)      Ru(1)     C(31)     149.1(1)   1_555 1_555 1_555 yes
   C(3)      Ru(1)     C(4)      36.8(1)    1_555 1_555 1_555 yes
   C(3)      Ru(1)     C(5)      61.7(1)    1_555 1_555 1_555 yes
   C(3)      Ru(1)     C(28)     122.3(1)   1_555 1_555 1_555 yes
   C(3)      Ru(1)     C(29)     93.5(1)    1_555 1_555 1_555 yes
   C(3)      Ru(1)     C(30)     90.2(1)    1_555 1_555 1_555 yes
   C(3)      Ru(1)     C(31)     115.0(1)   1_555 1_555 1_555 yes
   C(4)      Ru(1)     C(5)      36.9(1)    1_555 1_555 1_555 yes
   C(4)      Ru(1)     C(28)     157.6(1)   1_555 1_555 1_555 yes
   C(4)      Ru(1)     C(29)     122.4(1)   1_555 1_555 1_555 yes
   C(4)      Ru(1)     C(30)     100.0(1)   1_555 1_555 1_555 yes
   C(4)      Ru(1)     C(31)     103.0(1)   1_555 1_555 1_555 yes
   C(5)      Ru(1)     C(28)     157.1(1)   1_555 1_555 1_555 yes
   C(5)      Ru(1)     C(29)     155.2(1)   1_555 1_555 1_555 yes
   C(5)      Ru(1)     C(30)     135.4(1)   1_555 1_555 1_555 yes
   C(5)      Ru(1)     C(31)     122.6(1)   1_555 1_555 1_555 yes
   C(28)     Ru(1)     C(29)     36.8(1)    1_555 1_555 1_555 yes
   C(28)     Ru(1)     C(30)     66.9(1)    1_555 1_555 1_555 yes
   C(28)     Ru(1)     C(31)     77.9(1)    1_555 1_555 1_555 yes
   C(29)     Ru(1)     C(30)     38.1(1)    1_555 1_555 1_555 yes
   C(29)     Ru(1)     C(31)     67.4(1)    1_555 1_555 1_555 yes
   C(30)     Ru(1)     C(31)     37.2(1)    1_555 1_555 1_555 yes
   Ru(1)     P(1)      C(15)     115.6(1)   1_555 1_555 1_555 yes
   Ru(1)     P(1)      C(16)     118.95(9)  1_555 1_555 1_555 yes
   Ru(1)     P(1)      C(22)     114.10(10) 1_555 1_555 1_555 yes
   C(15)     P(1)      C(16)     98.3(1)    1_555 1_555 1_555 yes
   C(15)     P(1)      C(22)     105.4(1)   1_555 1_555 1_555 yes
   C(16)     P(1)      C(22)     102.2(1)   1_555 1_555 1_555 yes
   F(1)      P(2)      F(2)      179.0(2)   1_555 1_555 1_555 yes
   F(1)      P(2)      F(3)      85.6(2)    1_555 1_555 1_555 yes
   F(1)      P(2)      F(4)      90.5(2)    1_555 1_555 1_555 yes
   F(1)      P(2)      F(5)      88.0(2)    1_555 1_555 1_555 yes
   F(1)      P(2)      F(6)      87.7(2)    1_555 1_555 1_555 yes
   F(2)      P(2)      F(3)      95.2(3)    1_555 1_555 1_555 yes
   F(2)      P(2)      F(4)      88.6(2)    1_555 1_555 1_555 yes
   F(2)      P(2)      F(5)      91.5(3)    1_555 1_555 1_555 yes
   F(2)      P(2)      F(6)      92.8(3)    1_555 1_555 1_555 yes
   F(3)      P(2)      F(4)      176.1(2)   1_555 1_555 1_555 yes
   F(3)      P(2)      F(5)      91.1(2)    1_555 1_555 1_555 yes
   F(3)      P(2)      F(6)      89.4(2)    1_555 1_555 1_555 yes
   F(4)      P(2)      F(5)      89.2(2)    1_555 1_555 1_555 yes
   F(4)      P(2)      F(6)      90.0(2)    1_555 1_555 1_555 yes
   F(5)      P(2)      F(6)      175.6(3)   1_555 1_555 1_555 yes
   C(13)     O(2)      C(14)     115.0(3)   1_555 1_555 1_555 yes
   Ru(1)     C(1)      C(2)      74.9(2)    1_555 1_555 1_555 yes
   Ru(1)     C(1)      C(5)      70.7(2)    1_555 1_555 1_555 yes
   Ru(1)     C(1)      C(13)     116.2(2)   1_555 1_555 1_555 yes
   C(2)      C(1)      C(5)      107.7(2)   1_555 1_555 1_555 yes
   C(2)      C(1)      C(13)     126.9(3)   1_555 1_555 1_555 yes
   C(5)      C(1)      C(13)     125.1(3)   1_555 1_555 1_555 yes
   Ru(1)     C(2)      C(1)      67.9(2)    1_555 1_555 1_555 yes
   Ru(1)     C(2)      C(3)      70.3(2)    1_555 1_555 1_555 yes
   Ru(1)     C(2)      C(6)      130.1(2)   1_555 1_555 1_555 yes
   C(1)      C(2)      C(3)      106.4(2)   1_555 1_555 1_555 yes
   C(1)      C(2)      C(6)      126.6(3)   1_555 1_555 1_555 yes
   C(3)      C(2)      C(6)      126.8(3)   1_555 1_555 1_555 yes
   Ru(1)     C(3)      C(2)      73.0(2)    1_555 1_555 1_555 yes
   Ru(1)     C(3)      C(4)      71.9(2)    1_555 1_555 1_555 yes
   Ru(1)     C(3)      H(1)      121.8(2)   1_555 1_555 1_555 no
   C(2)      C(3)      C(4)      110.2(3)   1_555 1_555 1_555 yes
   C(2)      C(3)      H(1)      124.9(3)   1_555 1_555 1_555 no
   C(4)      C(3)      H(1)      124.9(3)   1_555 1_555 1_555 no
   Ru(1)     C(4)      C(3)      71.3(2)    1_555 1_555 1_555 yes
   Ru(1)     C(4)      C(5)      69.2(2)    1_555 1_555 1_555 yes
   Ru(1)     C(4)      C(7)      126.3(2)   1_555 1_555 1_555 yes
   C(3)      C(4)      C(5)      107.2(3)   1_555 1_555 1_555 yes
   C(3)      C(4)      C(7)      125.5(3)   1_555 1_555 1_555 yes
   C(5)      C(4)      C(7)      127.3(3)   1_555 1_555 1_555 yes
   Ru(1)     C(5)      C(1)      70.4(2)    1_555 1_555 1_555 yes
   Ru(1)     C(5)      C(4)      73.9(2)    1_555 1_555 1_555 yes
   Ru(1)     C(5)      H(2)      121.5(2)   1_555 1_555 1_555 no
   C(1)      C(5)      C(4)      108.2(2)   1_555 1_555 1_555 yes
   C(1)      C(5)      H(2)      125.9(3)   1_555 1_555 1_555 no
   C(4)      C(5)      H(2)      125.9(3)   1_555 1_555 1_555 no
   C(2)      C(6)      H(3)      109.5(3)   1_555 1_555 1_555 no
   C(2)      C(6)      H(4)      109.5(3)   1_555 1_555 1_555 no
   C(2)      C(6)      H(5)      109.5(3)   1_555 1_555 1_555 no
   H(3)      C(6)      H(4)      109.5(4)   1_555 1_555 1_555 no
   H(3)      C(6)      H(5)      109.5(4)   1_555 1_555 1_555 no
   H(4)      C(6)      H(5)      109.5(4)   1_555 1_555 1_555 no
   C(4)      C(7)      C(8)      120.8(3)   1_555 1_555 1_555 yes
   C(4)      C(7)      C(12)     121.0(3)   1_555 1_555 1_555 yes
   C(8)      C(7)      C(12)     118.1(3)   1_555 1_555 1_555 yes
   C(7)      C(8)      C(9)      120.9(3)   1_555 1_555 1_555 yes
   C(7)      C(8)      H(6)      119.6(3)   1_555 1_555 1_555 no
   C(9)      C(8)      H(6)      119.6(3)   1_555 1_555 1_555 no
   C(8)      C(9)      C(10)     120.7(3)   1_555 1_555 1_555 yes
   C(8)      C(9)      H(7)      119.6(4)   1_555 1_555 1_555 no
   C(10)     C(9)      H(7)      119.6(4)   1_555 1_555 1_555 no
   C(9)      C(10)     C(11)     118.8(3)   1_555 1_555 1_555 yes
   C(9)      C(10)     H(8)      120.6(4)   1_555 1_555 1_555 no
   C(11)     C(10)     H(8)      120.6(4)   1_555 1_555 1_555 no
   C(10)     C(11)     C(12)     120.4(3)   1_555 1_555 1_555 yes
   C(10)     C(11)     H(9)      119.8(3)   1_555 1_555 1_555 no
   C(12)     C(11)     H(9)      119.8(4)   1_555 1_555 1_555 no
   C(7)      C(12)     C(11)     121.1(3)   1_555 1_555 1_555 yes
   C(7)      C(12)     H(10)     119.5(3)   1_555 1_555 1_555 no
   C(11)     C(12)     H(10)     119.5(3)   1_555 1_555 1_555 no
   O(1)      C(13)     O(2)      124.5(3)   1_555 1_555 1_555 yes
   O(1)      C(13)     C(1)      126.4(3)   1_555 1_555 1_555 yes
   O(2)      C(13)     C(1)      108.9(3)   1_555 1_555 1_555 yes
   O(2)      C(14)     C(15)     110.0(3)   1_555 1_555 1_555 yes
   O(2)      C(14)     H(11)     109.3(3)   1_555 1_555 1_555 no
   O(2)      C(14)     H(12)     109.3(4)   1_555 1_555 1_555 no
   C(15)     C(14)     H(11)     109.3(4)   1_555 1_555 1_555 no
   C(15)     C(14)     H(12)     109.3(3)   1_555 1_555 1_555 no
   H(11)     C(14)     H(12)     109.5(3)   1_555 1_555 1_555 no
   P(1)      C(15)     C(14)     117.1(2)   1_555 1_555 1_555 yes
   P(1)      C(15)     H(13)     107.5(2)   1_555 1_555 1_555 no
   P(1)      C(15)     H(14)     107.5(3)   1_555 1_555 1_555 no
   C(14)     C(15)     H(13)     107.5(3)   1_555 1_555 1_555 no
   C(14)     C(15)     H(14)     107.5(3)   1_555 1_555 1_555 no
   H(13)     C(15)     H(14)     109.5(3)   1_555 1_555 1_555 no
   P(1)      C(16)     C(17)     118.9(2)   1_555 1_555 1_555 yes
   P(1)      C(16)     C(21)     121.5(3)   1_555 1_555 1_555 yes
   C(17)     C(16)     C(21)     119.7(3)   1_555 1_555 1_555 yes
   C(16)     C(17)     C(18)     118.7(3)   1_555 1_555 1_555 yes
   C(16)     C(17)     H(15)     120.6(3)   1_555 1_555 1_555 no
   C(18)     C(17)     H(15)     120.6(3)   1_555 1_555 1_555 no
   C(17)     C(18)     C(19)     121.1(4)   1_555 1_555 1_555 yes
   C(17)     C(18)     H(16)     119.4(4)   1_555 1_555 1_555 no
   C(19)     C(18)     H(16)     119.4(4)   1_555 1_555 1_555 no
   C(18)     C(19)     C(20)     119.8(4)   1_555 1_555 1_555 yes
   C(18)     C(19)     H(17)     120.1(4)   1_555 1_555 1_555 no
   C(20)     C(19)     H(17)     120.1(4)   1_555 1_555 1_555 no
   C(19)     C(20)     C(21)     120.7(3)   1_555 1_555 1_555 yes
   C(19)     C(20)     H(18)     119.7(4)   1_555 1_555 1_555 no
   C(21)     C(20)     H(18)     119.7(4)   1_555 1_555 1_555 no
   C(16)     C(21)     C(20)     120.0(3)   1_555 1_555 1_555 yes
   C(16)     C(21)     H(19)     120.0(3)   1_555 1_555 1_555 no
   C(20)     C(21)     H(19)     120.0(3)   1_555 1_555 1_555 no
   P(1)      C(22)     C(23)     119.9(2)   1_555 1_555 1_555 yes
   P(1)      C(22)     C(27)     120.0(2)   1_555 1_555 1_555 yes
   C(23)     C(22)     C(27)     120.0(3)   1_555 1_555 1_555 yes
   C(22)     C(23)     C(24)     120.3(3)   1_555 1_555 1_555 yes
   C(22)     C(23)     H(20)     119.8(3)   1_555 1_555 1_555 no
   C(24)     C(23)     H(20)     119.8(3)   1_555 1_555 1_555 no
   C(23)     C(24)     C(25)     119.7(3)   1_555 1_555 1_555 yes
   C(23)     C(24)     H(21)     120.1(3)   1_555 1_555 1_555 no
   C(25)     C(24)     H(21)     120.1(3)   1_555 1_555 1_555 no
   C(24)     C(25)     C(26)     120.6(3)   1_555 1_555 1_555 yes
   C(24)     C(25)     H(22)     119.7(4)   1_555 1_555 1_555 no
   C(26)     C(25)     H(22)     119.7(4)   1_555 1_555 1_555 no
   C(25)     C(26)     C(27)     120.0(3)   1_555 1_555 1_555 yes
   C(25)     C(26)     H(23)     120.0(4)   1_555 1_555 1_555 no
   C(27)     C(26)     H(23)     120.0(4)   1_555 1_555 1_555 no
   C(22)     C(27)     C(26)     119.2(3)   1_555 1_555 1_555 yes
   C(22)     C(27)     H(24)     120.4(3)   1_555 1_555 1_555 no
   C(26)     C(27)     H(24)     120.4(3)   1_555 1_555 1_555 no
   Ru(1)     C(28)     C(29)     70.8(2)    1_555 1_555 1_555 yes
   Ru(1)     C(28)     H(25)     129.8(3)   1_555 1_555 1_555 no
   Ru(1)     C(28)     H(26)     71.8(2)    1_555 1_555 1_555 no
   C(29)     C(28)     H(25)     120.0(3)   1_555 1_555 1_555 no
   C(29)     C(28)     H(26)     120.0(3)   1_555 1_555 1_555 no
   H(25)     C(28)     H(26)     120.0(3)   1_555 1_555 1_555 no
   Ru(1)     C(29)     C(28)     72.4(2)    1_555 1_555 1_555 yes
   Ru(1)     C(29)     C(30)     69.6(2)    1_555 1_555 1_555 yes
   Ru(1)     C(29)     C(32)     125.1(3)   1_555 1_555 1_555 yes
   C(28)     C(29)     C(30)     118.0(3)   1_555 1_555 1_555 yes
   C(28)     C(29)     C(32)     121.8(3)   1_555 1_555 1_555 yes
   C(30)     C(29)     C(32)     120.0(3)   1_555 1_555 1_555 yes
   Ru(1)     C(30)     C(29)     72.3(2)    1_555 1_555 1_555 yes
   Ru(1)     C(30)     C(31)     73.9(2)    1_555 1_555 1_555 yes
   Ru(1)     C(30)     H(27)     126.0(2)   1_555 1_555 1_555 no
   C(29)     C(30)     C(31)     120.7(3)   1_555 1_555 1_555 yes
   C(29)     C(30)     H(27)     119.7(3)   1_555 1_555 1_555 no
   C(31)     C(30)     H(27)     119.7(3)   1_555 1_555 1_555 no
   Ru(1)     C(31)     C(30)     68.9(2)    1_555 1_555 1_555 yes
   Ru(1)     C(31)     H(28)     75.2(2)    1_555 1_555 1_555 no
   Ru(1)     C(31)     H(29)     128.0(2)   1_555 1_555 1_555 no
   C(30)     C(31)     H(28)     120.0(3)   1_555 1_555 1_555 no
   C(30)     C(31)     H(29)     120.0(3)   1_555 1_555 1_555 no
   H(28)     C(31)     H(29)     120.0(3)   1_555 1_555 1_555 no
   C(29)     C(32)     H(30)     109.5(3)   1_555 1_555 1_555 no
   C(29)     C(32)     H(31)     109.5(4)   1_555 1_555 1_555 no
   C(29)     C(32)     H(32)     109.5(3)   1_555 1_555 1_555 no
   H(30)     C(32)     H(31)     109.5(4)   1_555 1_555 1_555 no
   H(30)     C(32)     H(32)     109.5(5)   1_555 1_555 1_555 no
   H(31)     C(32)     H(32)     109.5(4)   1_555 1_555 1_555 no
   O(3)      C(33)     C(34)     120.6(4)   1_555 1_555 1_555 yes
   O(3)      C(33)     C(35)     121.7(4)   1_555 1_555 1_555 yes
   C(34)     C(33)     C(35)     117.7(4)   1_555 1_555 1_555 yes
   C(33)     C(34)     H(33)     109.5(4)   1_555 1_555 1_555 no
   C(33)     C(34)     H(34)     109.5(4)   1_555 1_555 1_555 no
   C(33)     C(34)     H(35)     109.5(4)   1_555 1_555 1_555 no
   H(33)     C(34)     H(34)     109.5(4)   1_555 1_555 1_555 no
   H(33)     C(34)     H(35)     109.5(4)   1_555 1_555 1_555 no
   H(34)     C(34)     H(35)     109.5(5)   1_555 1_555 1_555 no
   C(33)     C(35)     H(36)     109.5(5)   1_555 1_555 1_555 no
   C(33)     C(35)     H(37)     109.5(4)   1_555 1_555 1_555 no
   C(33)     C(35)     H(38)     109.5(5)   1_555 1_555 1_555 no
   H(36)     C(35)     H(37)     109.5(6)   1_555 1_555 1_555 no
   H(36)     C(35)     H(38)     109.5(5)   1_555 1_555 1_555 no
   H(37)     C(35)     H(38)     109.5(6)   1_555 1_555 1_555 no
   O(4)      C(36)     C(37)     120.6(9)   1_555 1_555 1_555 yes
   O(4)      C(36)     C(37)     143(1)     1_555 1_555 2_444 yes
   C(37)     C(36)     C(37)     95.8(7)    1_555 1_555 2_444 yes
   C(36)     C(37)     H(39)     109.5(8)   1_555 1_555 1_555 no
   C(36)     C(37)     H(40)     109.5(8)   1_555 1_555 1_555 no
   C(36)     C(37)     H(41)     109.5(9)   1_555 1_555 1_555 no
   C(36)     C(37)     H(42)     109.5(9)   2_444 1_555 1_555 no
   C(36)     C(37)     H(43)     109.5(9)   2_444 1_555 1_555 no
   C(36)     C(37)     H(44)     109.5(9)   2_444 1_555 1_555 no
   H(39)     C(37)     H(40)     109(1)     1_555 1_555 1_555 no
   H(39)     C(37)     H(41)     109.5(9)   1_555 1_555 1_555 no
   H(40)     C(37)     H(41)     109.5(9)   1_555 1_555 1_555 no
   H(42)     C(37)     H(43)     109.5(10)  1_555 1_555 1_555 no
   H(42)     C(37)     H(44)     109.4(9)   1_555 1_555 1_555 no
   H(43)     C(37)     H(44)     109.5(9)   1_555 1_555 1_555 no
#------------------------------------------------------------------------------
loop_
_geom_torsion_atom_site_label_1
_geom_torsion_atom_site_label_2
_geom_torsion_atom_site_label_3
_geom_torsion_atom_site_label_4
_geom_torsion
_geom_torsion_site_symmetry_1
_geom_torsion_site_symmetry_2
_geom_torsion_site_symmetry_3
_geom_torsion_site_symmetry_4
_geom_torsion_publ_flag
   Ru(1)   P(1)    C(15)   C(14)   -77.0(3)  1_555 1_555 1_555 1_555 yes
   Ru(1)   P(1)    C(16)   C(17)   98.2(2)  1_555 1_555 1_555 1_555 yes
   Ru(1)   P(1)    C(16)   C(21)   -81.4(3)  1_555 1_555 1_555 1_555 yes
   Ru(1)   P(1)    C(22)   C(23)   -22.0(3)  1_555 1_555 1_555 1_555 yes
   Ru(1)   P(1)    C(22)   C(27)   161.5(3)  1_555 1_555 1_555 1_555 yes
   Ru(1)   C(1)    C(2)    C(3)    -60.1(2)  1_555 1_555 1_555 1_555 yes
   Ru(1)   C(1)    C(2)    C(6)    124.4(3)  1_555 1_555 1_555 1_555 yes
   Ru(1)   C(1)    C(5)    C(4)    64.7(2)  1_555 1_555 1_555 1_555 yes
   Ru(1)   C(1)    C(13)   O(1)    -91.0(4)  1_555 1_555 1_555 1_555 yes
   Ru(1)   C(1)    C(13)   O(2)    84.3(3)  1_555 1_555 1_555 1_555 yes
   Ru(1)   C(2)    C(1)    C(5)    63.5(2)  1_555 1_555 1_555 1_555 yes
   Ru(1)   C(2)    C(1)    C(13)   -111.7(3)  1_555 1_555 1_555 1_555 yes
   Ru(1)   C(2)    C(3)    C(4)    -62.7(2)  1_555 1_555 1_555 1_555 yes
   Ru(1)   C(3)    C(2)    C(1)    58.5(2)  1_555 1_555 1_555 1_555 yes
   Ru(1)   C(3)    C(2)    C(6)    -126.0(3)  1_555 1_555 1_555 1_555 yes
   Ru(1)   C(3)    C(4)    C(5)    -60.2(2)  1_555 1_555 1_555 1_555 yes
   Ru(1)   C(3)    C(4)    C(7)    121.7(3)  1_555 1_555 1_555 1_555 yes
   Ru(1)   C(4)    C(3)    C(2)    63.4(2)  1_555 1_555 1_555 1_555 yes
   Ru(1)   C(4)    C(5)    C(1)    -62.5(2)  1_555 1_555 1_555 1_555 yes
   Ru(1)   C(4)    C(7)    C(8)    82.3(4)  1_555 1_555 1_555 1_555 yes
   Ru(1)   C(4)    C(7)    C(12)   -100.6(3)  1_555 1_555 1_555 1_555 yes
   Ru(1)   C(5)    C(1)    C(2)    -66.3(2)  1_555 1_555 1_555 1_555 yes
   Ru(1)   C(5)    C(1)    C(13)   109.0(3)  1_555 1_555 1_555 1_555 yes
   Ru(1)   C(5)    C(4)    C(3)    61.5(2)  1_555 1_555 1_555 1_555 yes
   Ru(1)   C(5)    C(4)    C(7)    -120.4(3)  1_555 1_555 1_555 1_555 yes
   Ru(1)   C(28)   C(29)   C(30)   54.4(3)  1_555 1_555 1_555 1_555 yes
   Ru(1)   C(28)   C(29)   C(32)   -120.8(3)  1_555 1_555 1_555 1_555 yes
   Ru(1)   C(29)   C(30)   C(31)   58.1(3)  1_555 1_555 1_555 1_555 yes
   Ru(1)   C(30)   C(29)   C(28)   -55.8(3)  1_555 1_555 1_555 1_555 yes
   Ru(1)   C(30)   C(29)   C(32)   119.5(3)  1_555 1_555 1_555 1_555 yes
   Ru(1)   C(31)   C(30)   C(29)   -57.3(3)  1_555 1_555 1_555 1_555 yes
   P(1)    Ru(1)   C(1)    C(2)    -159.6(2)  1_555 1_555 1_555 1_555 yes
   P(1)    Ru(1)   C(1)    C(5)    85.1(2)  1_555 1_555 1_555 1_555 yes
   P(1)    Ru(1)   C(1)    C(13)   -35.4(2)  1_555 1_555 1_555 1_555 yes
   P(1)    Ru(1)   C(2)    C(1)    26.2(2)  1_555 1_555 1_555 1_555 yes
   P(1)    Ru(1)   C(2)    C(3)    144.2(1)  1_555 1_555 1_555 1_555 yes
   P(1)    Ru(1)   C(2)    C(6)    -93.8(3)  1_555 1_555 1_555 1_555 yes
   P(1)    Ru(1)   C(3)    C(2)    -72.2(2)  1_555 1_555 1_555 1_555 yes
   P(1)    Ru(1)   C(3)    C(4)    46.5(3)  1_555 1_555 1_555 1_555 yes
   P(1)    Ru(1)   C(4)    C(3)    -156.0(2)  1_555 1_555 1_555 1_555 yes
   P(1)    Ru(1)   C(4)    C(5)    -38.5(2)  1_555 1_555 1_555 1_555 yes
   P(1)    Ru(1)   C(4)    C(7)    83.3(2)  1_555 1_555 1_555 1_555 yes
   P(1)    Ru(1)   C(5)    C(1)    -96.0(2)  1_555 1_555 1_555 1_555 yes
   P(1)    Ru(1)   C(5)    C(4)    147.4(2)  1_555 1_555 1_555 1_555 yes
   P(1)    Ru(1)   C(28)   C(29)   -152.9(2)  1_555 1_555 1_555 1_555 yes
   P(1)    Ru(1)   C(29)   C(28)   29.9(2)  1_555 1_555 1_555 1_555 yes
   P(1)    Ru(1)   C(29)   C(30)   -100.1(2)  1_555 1_555 1_555 1_555 yes
   P(1)    Ru(1)   C(29)   C(32)   146.9(3)  1_555 1_555 1_555 1_555 yes
   P(1)    Ru(1)   C(30)   C(29)   98.6(2)  1_555 1_555 1_555 1_555 yes
   P(1)    Ru(1)   C(30)   C(31)   -31.9(2)  1_555 1_555 1_555 1_555 yes
   P(1)    Ru(1)   C(31)   C(30)   151.3(2)  1_555 1_555 1_555 1_555 yes
   P(1)    C(15)   C(14)   O(2)    39.7(4)  1_555 1_555 1_555 1_555 yes
   P(1)    C(16)   C(17)   C(18)   -179.2(2)  1_555 1_555 1_555 1_555 yes
   P(1)    C(16)   C(21)   C(20)   177.7(2)  1_555 1_555 1_555 1_555 yes
   P(1)    C(22)   C(23)   C(24)   179.4(3)  1_555 1_555 1_555 1_555 yes
   P(1)    C(22)   C(27)   C(26)   -179.5(3)  1_555 1_555 1_555 1_555 yes
   O(1)    C(13)   O(2)    C(14)   41.4(5)  1_555 1_555 1_555 1_555 yes
   O(1)    C(13)   C(1)    C(2)    -0.6(6)  1_555 1_555 1_555 1_555 yes
   O(1)    C(13)   C(1)    C(5)    -175.0(4)  1_555 1_555 1_555 1_555 yes
   O(2)    C(13)   C(1)    C(2)    174.8(3)  1_555 1_555 1_555 1_555 yes
   O(2)    C(13)   C(1)    C(5)    0.3(4)   1_555 1_555 1_555 1_555 yes
   C(1)    Ru(1)   P(1)    C(15)   41.3(1)  1_555 1_555 1_555 1_555 yes
   C(1)    Ru(1)   P(1)    C(16)   158.0(1)  1_555 1_555 1_555 1_555 yes
   C(1)    Ru(1)   P(1)    C(22)   -81.1(1)  1_555 1_555 1_555 1_555 yes
   C(1)    Ru(1)   C(2)    C(3)    118.0(2)  1_555 1_555 1_555 1_555 yes
   C(1)    Ru(1)   C(2)    C(6)    -120.0(4)  1_555 1_555 1_555 1_555 yes
   C(1)    Ru(1)   C(3)    C(2)    -37.2(2)  1_555 1_555 1_555 1_555 yes
   C(1)    Ru(1)   C(3)    C(4)    81.6(2)  1_555 1_555 1_555 1_555 yes
   C(1)    Ru(1)   C(4)    C(3)    -78.5(2)  1_555 1_555 1_555 1_555 yes
   C(1)    Ru(1)   C(4)    C(5)    39.0(2)  1_555 1_555 1_555 1_555 yes
   C(1)    Ru(1)   C(4)    C(7)    160.7(3)  1_555 1_555 1_555 1_555 yes
   C(1)    Ru(1)   C(5)    C(4)    -116.6(2)  1_555 1_555 1_555 1_555 yes
   C(1)    Ru(1)   C(28)   C(29)   117.6(2)  1_555 1_555 1_555 1_555 yes
   C(1)    Ru(1)   C(29)   C(28)   -88.3(2)  1_555 1_555 1_555 1_555 yes
   C(1)    Ru(1)   C(29)   C(30)   141.7(2)  1_555 1_555 1_555 1_555 yes
   C(1)    Ru(1)   C(29)   C(32)   28.7(3)  1_555 1_555 1_555 1_555 yes
   C(1)    Ru(1)   C(30)   C(29)   -80.5(3)  1_555 1_555 1_555 1_555 yes
   C(1)    Ru(1)   C(30)   C(31)   149.0(2)  1_555 1_555 1_555 1_555 yes
   C(1)    Ru(1)   C(31)   C(30)   -128.8(3)  1_555 1_555 1_555 1_555 yes
   C(1)    C(2)    Ru(1)   C(3)    -118.0(2)  1_555 1_555 1_555 1_555 yes
   C(1)    C(2)    Ru(1)   C(4)    -81.5(2)  1_555 1_555 1_555 1_555 yes
   C(1)    C(2)    Ru(1)   C(5)    -39.6(2)  1_555 1_555 1_555 1_555 yes
   C(1)    C(2)    Ru(1)   C(28)   118.9(2)  1_555 1_555 1_555 1_555 yes
   C(1)    C(2)    Ru(1)   C(29)   155.3(2)  1_555 1_555 1_555 1_555 yes
   C(1)    C(2)    Ru(1)   C(30)   -169.7(2)  1_555 1_555 1_555 1_555 yes
   C(1)    C(2)    Ru(1)   C(31)   -148.2(2)  1_555 1_555 1_555 1_555 yes
   C(1)    C(2)    C(3)    C(4)    -4.2(4)  1_555 1_555 1_555 1_555 yes
   C(1)    C(5)    Ru(1)   C(2)    37.9(2)  1_555 1_555 1_555 1_555 yes
   C(1)    C(5)    Ru(1)   C(3)    79.5(2)  1_555 1_555 1_555 1_555 yes
   C(1)    C(5)    Ru(1)   C(4)   116.6(2)  1_555 1_555 1_555 1_555 yes
   C(1)    C(5)    Ru(1)   C(28)  -27.0(4)  1_555 1_555 1_555 1_555 yes
   C(1)    C(5)    Ru(1)   C(29)   75.3(3)  1_555 1_555 1_555 1_555 yes
   C(1)    C(5)    Ru(1)   C(30)  136.8(2)  1_555 1_555 1_555 1_555 yes
   C(1)    C(5)    Ru(1)   C(31)  -177.4(2)  1_555 1_555 1_555 1_555 yes
   C(1)    C(5)    C(4)    C(3)    -0.9(3)  1_555 1_555 1_555 1_555 yes  
   C(1)    C(5)    C(4)    C(7)   177.1(3)  1_555 1_555 1_555 1_555 yes
   C(1)    C(13)   O(2)    C(14)  -134.0(3)  1_555 1_555 1_555 1_555 yes 
   C(2)    Ru(1)   P(1)    C(15)   25.9(2)  1_555 1_555 1_555 1_555 yes  
   C(2)    Ru(1)   P(1)    C(16)  142.5(1)  1_555 1_555 1_555 1_555 yes
   C(2)    Ru(1)   P(1)    C(22)  -96.6(2)   1_555 1_555 1_555 1_555 yes
   C(2)    Ru(1)   C(1)    C(5)  -115.4(2)  1_555 1_555 1_555 1_555 yes 
   C(2)    Ru(1)   C(1)    C(13)  124.1(3)  1_555 1_555 1_555 1_555 yes
   C(2)    Ru(1)   C(3)    C(4)   118.7(3)   1_555 1_555 1_555 1_555 yes
   C(2)    Ru(1)   C(4)    C(3)   -36.4(2)  1_555 1_555 1_555 1_555 yes 
   C(2)    Ru(1)   C(4)    C(5)    81.1(2)  1_555 1_555 1_555 1_555 yes
   C(2)    Ru(1)   C(4)    C(7)  -157.2(3)   1_555 1_555 1_555 1_555 yes
   C(2)    Ru(1)   C(5)    C(4)   -78.7(2)  1_555 1_555 1_555 1_555 yes 
   C(2)    Ru(1)   C(28)   C(29)   79.9(2)  1_555 1_555 1_555 1_555 yes
   C(2)    Ru(1)   C(29)   C(28) -107.5(2)  1_555 1_555 1_555 1_555 yes
   C(2)    Ru(1)   C(29)   C(30)  122.5(2)  1_555 1_555 1_555 1_555 yes 
   C(2)    Ru(1)   C(29)   C(32)    9.5(3)  1_555 1_555 1_555 1_555 yes
   C(2)    Ru(1)   C(30)   C(29)  -67.6(2)  1_555 1_555 1_555 1_555 yes
   C(2)    Ru(1)   C(30)   C(31)  161.9(2)  1_555 1_555 1_555 1_555 yes 
   C(2)    Ru(1)   C(31)   C(30)  -33.2(3)  1_555 1_555 1_555 1_555 yes
   C(2)    C(1)    Ru(1)   C(3)    36.7(2)  1_555 1_555 1_555 1_555 yes 
   C(2)    C(1)    Ru(1)   C(4)    78.3(2)  1_555 1_555 1_555 1_555 yes  
   C(2)    C(1)    Ru(1)   C(5)   115.4(2)  1_555 1_555 1_555 1_555 yes
   C(2)    C(1)    Ru(1)   C(28)  -76.4(2)  1_555 1_555 1_555 1_555 yes 
   C(2)    C(1)    Ru(1)   C(29)  -32.7(2)  1_555 1_555 1_555 1_555 yes 
   C(2)    C(1)    Ru(1)   C(30)   19.6(3)  1_555 1_555 1_555 1_555 yes
   C(2)    C(1)    Ru(1)   C(31)  122.1(3)  1_555 1_555 1_555 1_555 yes
   C(2)    C(1)    C(5)    C(4)    -1.6(3)  1_555 1_555 1_555 1_555 yes  
   C(2)    C(3)    Ru(1)   C(4)  -118.7(3)  1_555 1_555 1_555 1_555 yes
   C(2)    C(3)    Ru(1)   C(5)   -81.5(2)  1_555 1_555 1_555 1_555 yes
   C(2)    C(3)    Ru(1)   C(28)   72.3(2)   1_555 1_555 1_555 1_555 yes 
   C(2)    C(3)    Ru(1)   C(29)   96.7(2)  1_555 1_555 1_555 1_555 yes
   C(2)    C(3)    Ru(1)   C(30)  134.7(2)  1_555 1_555 1_555 1_555 yes
   C(2)    C(3)    Ru(1)   C(31)  163.4(2)  1_555 1_555 1_555 1_555 yes 
   C(2)    C(3)    C(4)    C(5)     3.2(4)  1_555 1_555 1_555 1_555 yes
   C(2)    C(3)    C(4)    C(7)  -174.9(3)   1_555 1_555 1_555 1_555 yes
   C(3)    Ru(1)   P(1)    C(15)   71.9(2)  1_555 1_555 1_555 1_555 yes 
   C(3)    Ru(1)   P(1)    C(16)  -171.5(2)  1_555 1_555 1_555 1_555 yes
   C(3)    Ru(1)   P(1)    C(22)  -50.6(2)   1_555 1_555 1_555 1_555 yes
   C(3)    Ru(1)   C(1)    C(5)   -78.7(2)  1_555 1_555 1_555 1_555 yes 
   C(3)    Ru(1)   C(1)    C(13)  160.8(3)  1_555 1_555 1_555 1_555 yes
   C(3)    Ru(1)   C(2)    C(6)   122.0(4)  1_555 1_555 1_555 1_555 yes
   C(3)    Ru(1)   C(4)    C(5)   117.5(3)   1_555 1_555 1_555 1_555 yes 
   C(3)    Ru(1)   C(4)    C(7)  -120.7(3)  1_555 1_555 1_555 1_555 yes
   C(3)    Ru(1)   C(5)    C(4)   -37.1(2)  1_555 1_555 1_555 1_555 yes
   C(3)    Ru(1)   C(28)   C(29)   43.7(3)  1_555 1_555 1_555 1_555 yes 
   C(3)    Ru(1)   C(29)   C(28)  -144.2(2)  1_555 1_555 1_555 1_555 yes
   C(3)    Ru(1)   C(29)   C(30)   85.8(2)  1_555 1_555 1_555 1_555 yes
   C(3)    Ru(1)   C(29)   C(32)  -27.2(3)  1_555 1_555 1_555 1_555 yes 
   C(3)    Ru(1)   C(30)   C(29)  -95.5(2)  1_555 1_555 1_555 1_555 yes
   C(3)    Ru(1)   C(30)   C(31)  134.0(2)  1_555 1_555 1_555 1_555 yes
   C(3)    Ru(1)   C(31)   C(30)  -52.6(2)  1_555 1_555 1_555 1_555 yes 
   C(3)    C(2)    Ru(1)   C(4)    36.5(2)  1_555 1_555 1_555 1_555 yes
   C(3)    C(2)    Ru(1)   C(5)    78.4(2)  1_555 1_555 1_555 1_555 yes 
   C(3)    C(2)    Ru(1)   C(28)  -123.1(2)  1_555 1_555 1_555 1_555 yes 
   C(3)    C(2)    Ru(1)   C(29)  -86.7(2)  1_555 1_555 1_555 1_555 yes 
   C(3)    C(2)    Ru(1)   C(30)  -51.6(2)  1_555 1_555 1_555 1_555 yes 
   C(3)    C(2)    Ru(1)   C(31)  -30.2(3)  1_555 1_555 1_555 1_555 yes
   C(3)    C(2)    C(1)    C(5)     3.5(3)  1_555 1_555 1_555 1_555 yes 
   C(3)    C(2)    C(1)    C(13)  -171.8(3)  1_555 1_555 1_555 1_555 yes
   C(3)    C(4)    Ru(1)   C(5)  -117.5(3)  1_555 1_555 1_555 1_555 yes
   C(3)    C(4)    Ru(1)   C(28)   25.0(4)  1_555 1_555 1_555 1_555 yes 
   C(3)    C(4)    Ru(1)   C(29)   43.3(2)  1_555 1_555 1_555 1_555 yes
   C(3)    C(4)    Ru(1)   C(30)   76.7(2)  1_555 1_555 1_555 1_555 yes 
   C(3)    C(4)    Ru(1)   C(31)  114.6(2)  1_555 1_555 1_555 1_555 ye
   C(3)    C(4)    C(7)    C(8)    -9.6(5)  1_555 1_555 1_555 1_555 yes 
   C(3)    C(4)    C(7)    C(12)  167.4(3)  1_555 1_555 1_555 1_555 yes 
   C(4)    Ru(1)   P(1)    C(15)  102.0(2)   1_555 1_555 1_555 1_555 yes
   C(4)    Ru(1)   P(1)    C(16)  -141.3(1)  1_555 1_555 1_555 1_555 yes 
   C(4)    Ru(1)   P(1)    C(22)  -20.5(2)  1_555 1_555 1_555 1_555 yes
   C(4)    Ru(1)   C(1)    C(5)   -37.1(2)  1_555 1_555 1_555 1_555 yes 
   C(4)    Ru(1)   C(1)    C(13)  -157.5(3)  1_555 1_555 1_555 1_555 ye
   C(4)    Ru(1)   C(2)    C(6)   158.5(3)  1_555 1_555 1_555 1_555 yes 
   C(4)    Ru(1)   C(28)   C(29)   26.2(4)  1_555 1_555 1_555 1_555 yes 
   C(4)    Ru(1)   C(29)   C(28)  -168.5(2)  1_555 1_555 1_555 1_555 yes 
   C(4)    Ru(1)   C(29)   C(30)   61.5(2)  1_555 1_555 1_555 1_555 ye
   C(4)    Ru(1)   C(29)   C(32)  -51.5(3)  1_555 1_555 1_555 1_555 ye
   C(4)    Ru(1)   C(30)   C(29)  -131.2(2)  1_555 1_555 1_555 1_555 yes
   C(4)    Ru(1)   C(30)   C(31)   98.3(2)  1_555 1_555 1_555 1_555 yes 
   C(4)    Ru(1)   C(31)   C(30)  -89.5(2)  1_555 1_555 1_555 1_555 ye
   C(4)    C(3)    Ru(1)   C(5)    37.2(2)  1_555 1_555 1_555 1_555 yes 
   C(4)    C(3)    Ru(1)   C(28)  -169.0(2)  1_555 1_555 1_555 1_555 yes 
   C(4)    C(3)    Ru(1)   C(29)  -144.6(2)   1_555 1_555 1_555 1_555 yes
   C(4)    C(3)    Ru(1)   C(30)  -106.6(2)  1_555 1_555 1_555 1_555 ye
   C(4)    C(3)    Ru(1)   C(31)  -77.9(2)  1_555 1_555 1_555 1_555 ye
   C(4)    C(3)    C(2)    C(6)   171.4(3)   1_555 1_555 1_555 1_555 yes
   C(4)    C(5)    Ru(1)   C(28)  -143.6(3)  1_555 1_555 1_555 1_555 yes 
   C(4)    C(5)    Ru(1)   C(29)  -41.3(4)  1_555 1_555 1_555 1_555 ye
   C(4)    C(5)    Ru(1)   C(30)   20.2(3)  1_555 1_555 1_555 1_555 yes 
   C(4)    C(5)    Ru(1)   C(31)   65.9(2)   1_555 1_555 1_555 1_555 yes
   C(4)    C(5)    C(1)    C(13)  173.7(3)  1_555 1_555 1_555 1_555 yes 
   C(4)    C(7)    C(8)    C(9)   178.0(3)   1_555 1_555 1_555 1_555 yes
   C(4)    C(7)    C(12 )   C(11)  -178.7(3)  1_555 1_555 1_555 1_555 ye
   C(5)    Ru(1)   P(1)    C(15)   80.0(1)   1_555 1_555 1_555 1_555 yes
   C(5)    Ru(1)   P(1)    C(16)  -163.3(1)   1_555 1_555 1_555 1_555 yes
   C(5)    Ru(1)   P(1)    C(22)  -42.4(1)  1_555 1_555 1_555 1_555 ye
   C(5)    Ru(1)   C(1)    C(13)  -120.5(3)  1_555 1_555 1_555 1_555 yes 
   C(5)    Ru(1)   C(2)    C(6)  -159.6(3)   1_555 1_555 1_555 1_555 yes
   C(5)    Ru(1)   C(4)    C(7)   121.7(3)  1_555 1_555 1_555 1_555 yes 
   C(5)    Ru(1)   C(28)   C(29)  136.8(3)   1_555 1_555 1_555 1_555 yes
   C(5)    Ru(1)   C(29)   C(28)  -140.5(3)  1_555 1_555 1_555 1_555 ye
   C(5)    Ru(1)   C(29)   C(30)   89.5(3)  1_555 1_555 1_555 1_555 yes 
   C(5)    Ru(1)   C(29)   C(32)  -23.5(5)  1_555 1_555 1_555 1_555 yes 
   C(5)    Ru(1)   C(30)   C(29)  -143.3(2)  1_555 1_555 1_555 1_555 ye
   C(5)    Ru(1)   C(30)   C(31)   86.2(2)  1_555 1_555 1_555 1_555 yes  
   C(5)    Ru(1)   C(31)   C(30)  -123.8(2)   1_555 1_555 1_555 1_555 yes
   C(5)    C(1)    Ru(1)   C(28)  168.2(2)  1_555 1_555 1_555 1_555 yes 
   C(5)    C(1)    Ru(1)   C(29)  -148.1(2)  1_555 1_555 1_555 1_555 yes
   C(5)    C(1)    Ru(1)   C(30)  -95.7(3)  1_555 1_555 1_555 1_555 ye
   C(5)    C(1)    Ru(1)   C(31)    6.8(4)  1_555 1_555 1_555 1_555 yes 
   C(5)    C(1)    C(2)    C(6)  -172.1(3)  1_555 1_555 1_555 1_555 yes 
   C(5)    C(4)    Ru(1)   C(28)  142.6(3)  1_555 1_555 1_555 1_555 ye
   C(5)    C(4)    Ru(1)   C(29)  160.8(2)  1_555 1_555 1_555 1_555 yes  
   C(5)    C(4)    Ru(1)   C(30)  -165.8(2)   1_555 1_555 1_555 1_555 yes 
   C(5)    C(4)    Ru(1)   C(31)  -127.9(2)  1_555 1_555 1_555 1_555 yes  
   C(5)    C(4)    C(7)    C(8)   172.7(3)   1_555 1_555 1_555 1_555 yes
   C(5)    C(4)    C(7)    C(12)  -10.3(5)  1_555 1_555 1_555 1_555 ye
   C(6)    C(2)    Ru(1)   C(28)   -1.1(3)  1_555 1_555 1_555 1_555 yes 
   C(6)    C(2)    Ru(1)   C(29)   35.3(3)  1_555 1_555 1_555 1_555 yes 
   C(6)    C(2)    Ru(1)   C(30)   70.4(3)  1_555 1_555 1_555 1_555 ye
   C(6)    C(2)    Ru(1)   C(31)   91.8(3)  1_555 1_555 1_555 1_555 yes  
   C(6)    C(2)    C(1)    C(13)   12.7(5)    1_555 1_555 1_555 1_555 yes
   C(7)    C(4)    Ru(1)   C(28)  -95.7(4)  1_555 1_555 1_555 1_555 yes 
   C(7)    C(4)    Ru(1)   C(29)  -77.4(3)   1_555 1_555 1_555 1_555 yes
   C(7)    C(4)    Ru(1)   C(30)  -44.0(3)  1_555 1_555 1_555 1_555 ye
   C(7)    C(4)    Ru(1)   C(31)   -6.1(3)  1_555 1_555 1_555 1_555 yes 
   C(7)    C(8)    C(9)    C(10)    0.0(6)  1_555 1_555 1_555 1_555 yes 
   C(7)    C(12 )   C(11)   C(10)    1.4(5)   1_555 1_555 1_555 1_555 ye
   C(8)    C(7)    C(12)   C(11)   -1.6(5)  1_555 1_555 1_555 1_555 yes  
   C(8)    C(9)    C(10)   C(11)   -0.2(6)    1_555 1_555 1_555 1_555 yes
   C(9)    C(8)    C(7)    C(12)    0.9(5)  1_555 1_555 1_555 1_555 yes 
   C(9)    C(10 )   C(11)   C(12)   -0.5(6)  1_555 1_555 1_555 1_555 yes
   C(13)   O(2)    C(14)   C(15)   58.4(4)1_555 1_555 1_555 1_555 ye
   C(13)   C(1)    Ru(1)   C(28)   47.7(3)  1_555 1_555 1_555 1_555 yes 
   C(13)   C(1)    Ru(1)   C(29)   91.4(3) 1_555 1_555 1_555 1_555 yes 
   C(13)   C(1)    Ru(1)   C(30)  143.8(2)   1_555 1_555 1_555 1_555 ye
   C(13)   C(1)    Ru(1)   C(31)  -113.7(4)  1_555 1_555 1_555 1_555 yes  
   C(14)    C(15)   P(1)    C(16)  155.2(3)    1_555 1_555 1_555 1_555 yes
   C(14)   C(15)   P(1)    C(22)   50.0(3)  1_555 1_555 1_555 1_555 yes 
   C(15)   P(1)    Ru(1)   C(28)  -78.4(2)   1_555 1_555 1_555 1_555 yes
   C(15)   P(1)    Ru(1)   C(29)  -95.9(2)  1_555 1_555 1_555 1_555 ye
   C(15)   P(1)    Ru(1)   C(30)  -138.2(2)  1_555 1_555 1_555 1_555 yes 
   C(15)   P(1)    Ru(1)   C(31)  -157.0(1)  1_555 1_555 1_555 1_555 yes 
   C(15)   P(1)    C(16)   C(17)  -136.3(2)   1_555 1_555 1_555 1_555 ye
   C(15)   P(1)    C(16)   C(21)   44.0(3)  1_555 1_555 1_555 1_555 yes   
   C(15)   P(1)    C(22)   C(23)  -149.9(3)    1_555 1_555 1_555 1_555 yes
   C(15)   P(1)    C(22)   C(27)   33.6(3)  1_555 1_555 1_555 1_555 yes  
   C(16)   P(1)    Ru(1)   C(28)   38.3(1)  1_555 1_555 1_555 1_555 yes 
   C(16)   P(1)    Ru(1)   C(29)   20.7(2)  1_555 1_555 1_555 1_555 ye 
   C(16)   P(1)    Ru(1)   C(30)  -21.6(1)  1_555 1_555 1_555 1_555 yes 
   C(16)   P(1)    Ru(1)   C(31)  -40.4(1)  1_555 1_555 1_555 1_555 yes 
   C(16)   P(1)    C(22)   C(23)  107.7(3)   1_555 1_555 1_555 1_555 ye
   C(16)   P(1)    C(22)   C(27)  -68.7(3)  1_555 1_555 1_555 1_555 yes  
   C(16)   C(17)   C(18)   C(19)    0.2(5)   1_555 1_555 1_555 1_555 yes
   C(16)   C(21)   C(20)   C(19)    2.8(5)  1_555 1_555 1_555 1_555 yes 
   C(17)   C(16)   P(1)    C(22)  -28.5(3)   1_555 1_555 1_555 1_555 yes
   C(17)   C(16)   C(21)   C(20)   -1.9(5)  1_555 1_555 1_555 1_555 ye
   C(17)   C(18)   C(19)   C(20)    0.6(5)  1_555 1_555 1_555 1_555 yes 
   C(18)   C(17)   C(16)   C(21)    0.4(4)  1_555 1_555 1_555 1_555 yes 
   C(18)   C(19)   C(20)   C(21)   -2.1(5)  1_555 1_555 1_555 1_555 ye
   C(21)   C(16)   P(1)    C 22)  151.9(2)  1_555 1_555 1_555 1_555 yes  
   C(22)   P(1)    Ru(1)   C(28)  159.1(2)  1_555 1_555 1_555 1_555 yes
   C(22)   P(1)    Ru(1)   C(29)  141.6(2)  1_555 1_555 1_555 1_555 yes 
   C(22)   P(1)    Ru(1)   C(30)   99.3(1)   1_555 1_555 1_555 1_555 yes
   C(22)   P(1)    Ru(1)   C(31)   80.5(1)   1_555 1_555 1_555 1_555 ye
   C(22)   C(23)   C(24)   C(25)    0.7(6)  1_555 1_555 1_555 1_555 yes 
   C(22)   C(27)   C(26)   C(25)   -0.6(7)  1_555 1_555 1_555 1_555 yes 
   C(23)   C(22)   C(27)   C(26)    4.0(6)  1_555 1_555 1_555 1_555 ye
   C(23)   C(24)   C(25)   C(26)    2.9(6)  1_555 1_555 1_555 1_555 yes  
   C(24)   C(23)   C(22)   C(27)   -4.1(5)   1_555 1_555 1_555 1_555 yes
   C(24)   C(25)   C(26)   C(27)   -2.9(7)  1_555 1_555 1_555 1_555 yes 
   C(28)   Ru(1)   C(29)   C(30)  -130.0(3)   1_555 1_555 1_555 1_555 yes
   C(28)   Ru(1)   C(29)   C(32)  117.0(4)  1_555 1_555 1_555 1_555 ye
   C(28)   Ru(1)   C(30)   C(29)   29.9(2)  1_555 1_555 1_555 1_555 yes 
   C(28)   Ru(1)   C(30)   C(31)  -100.6(2)  1_555 1_555 1_555 1_555 yes 
   C(28)   Ru(1)   C(31)   C(30)   67.6(2)  1_555 1_555 1_555 1_555 ye
   C(28)   C(29)   Ru(1)   C(30)  130.0(3)  1_555 1_555 1_555 1_555 yes  
   C(28)   C(29)   Ru(1)   C(31)  100.2(2)  1_555 1_555 1_555 1_555 yes 
   C(28)   C(29)   C(30)   C(31)    2.3(5)   1_555 1_555 1_555 1_555 yes
   C(29)   Ru(1)   C(30)   C(31)  -130.5(3)  1_555 1_555 1_555 1_555 ye
   C(29)   Ru(1)   C(31)   C(30)   30.5(2)  1_555 1_555 1_555 1_555 yes 
   C(29)   C(28)   Ru(1)   C(30)  -30.9(2)  1_555 1_555 1_555 1_555 yes 
   C(29)   C(28)   Ru(1)   C(31)  -68.4(2)  1_555 1_555 1_555 1_555 ye
   C(29)   C(30)   Ru(1)   C(31)  130.5(3)  1_555 1_555 1_555 1_555 yes  
   C(30)   Ru(1)   C(29)   C(32)  -113.0(4)  1_555 1_555 1_555 1_555 yes 
   C(30)   C(29)   Ru(1)   C(31)  -29.9(2)   1_555 1_555 1_555 1_555 yes
   C(31)   Ru(1)   C(29)   C(32)  -142.9(3)  1_555 1_555 1_555 1_555 ye
   C(31)   C(30)   C(29)   C(32)  177.6(3)  1_555 1_555 1_555 1_555 yes 
#------------------------------------------------------------------------------

_publ_contact_author_name           ' Shigetoshi TAKAHASHI'

_publ_contact_author_address
;
    8-1 Mihogaoka, Ibaraki, Osaka 567-0047, Japan
;
_publ_contact_author_email            ' takahashi@sanken.osaka-u.ac.jp '
_publ_contact_author_fax              ' +81-(0)6-6879-8459 '
_publ_contact_author_phone            ' ENTER PHONE NUMBER '
_publ_contact_letter
;
    ENTER TEXT OF LETTER
;
_publ_requested_journal               ' ENTER JOURNAL NAME HERE'
_publ_requested_category              ' CHOOSE FI FM FO CI CM CO or AD'

_publ_requested_coeditor_name          ?

_publ_section_title
;
    ENTER SECTION TITLE
;

_publ_section_title_footnote
;
    ENTER FOOTNOTE TO TITLE OF PAPER
;
loop_
_publ_author_name
_publ_author_footnote
_publ_author_address' FIRST AUTHORS NAME '
;
  FIRST AUTHORS ADDRESS
;

_publ_section_synopsis
;
    ENTER SYNOPSIS
;

_publ_section_abstract
;
    ENTER ABSTRACT
;

_publ_section_comment
;
    ENTER TEXT
;

_publ_section_acknowledgements
;
    ENTER ACKNOWLEDGEMENTS
;

_publ_section_experimental
;
    ENTER EXPERIMENTAL SECTION
;

_publ_section_references
;
    ENTER OTHER REFERENCES
Molecular Structure Corporation, Rigaku Corporation. (1998). teXsan. 
Single Crystal Structure Analysis Software. Version 1.9.
MSC, 3200 Research Forest Drive, The Woodlands, TX 77381, USA.
Rigaku, 3-9-12 Akishima, Tokyo, Japan.
North, A.C.T., Phillips, D. C. & Mathews, F. S. (1968).
Acta Cryst. A24, 351-359.
;

_publ_section_table_legends
;
    ENTER TABLE LEGENDS
;

_publ_section_figure_captions
;
    ENTER FIGURE CAPTIONS
;

_publ_section_exptl_prep
;
    ENTER COMPOUND PREPARATION DETAILS
;

_publ_section_exptl_refinement
;
    ENTER SPECIAL DETAILS OF THE REFINEMENT
;

#===END
 
